# Supplementary material for: Comparison of Lemborexant With Placebo and Zolpidem Tartrate Extended Release for the Treatment of Older Adults With Insomnia Disorder: A Phase 3 Randomized Clinical Trial
Source: PubMed Central journal article supplement — JAMA Netw Open. 2019 Dec 27;2(12):e1918254. doi: 10.1001/jamanetworkopen.2019.18254 (PMC6991236; doi:10.1001/jamanetworkopen.2019.18254), 2019-12-27
Supplement: jamanetwopen-2-e1918254-s003.pdf [file jamanetwopen-2-e1918254-s003.pdf]

## Data Sharing Statement

Rosenberg. Comparison of Lemborexant With Placebo and Zolpidem Tartrate Extended Release for the Treatment of Older Adults With Insomnia Disorder. *JAMA Netw Open*. Published December 27, 2019. 10.1001/jamanetworkopen.2019.18254

### Data

**Data available:** No

### Additional Information

**Explanation for why data not available:** De-identified participant data that underlie the results reported in this article will not be made available, but summary information will be made available on ClinicalTrials.gov following drug approval
